# Supplementary material for: FasL+PD‐L2+ Identifies a Novel Immunosuppressive Neutrophil Population in Human Gastric Cancer That Promotes Disease Progression
Source: PubMed Central journal article supplement (PMC8844550; doi:10.1002/advs.202103543), 2021-12-26
Supplement: ADVS-9-2103543-s001.pdf [file ADVS-9-2103543-s001.pdf]

## Supporting Information

for *Adv. Sci.*, DOI: 10.1002/advs.202103543

FasL<sup>+</sup>PD-L2<sup>+</sup> Identifies a Novel Immunosuppressive Neutrophil Population in Human Gastric Cancer That Promotes Disease Progression

*Zhi-Guo Shan, Yong-Liang Zhao, Jin-Yu Zhang, Zong-Bao Yan, Ting-Ting Wang, Fang-Yuan Mao, Yong-Sheng Teng, Liu-Sheng Peng, Wan-Yan Chen, Pan Wang, Ping Cheng, Wen-Qing Tian, Jun Chen, Weisan Chen, and Yuan Zhuang\**

Figure S1.

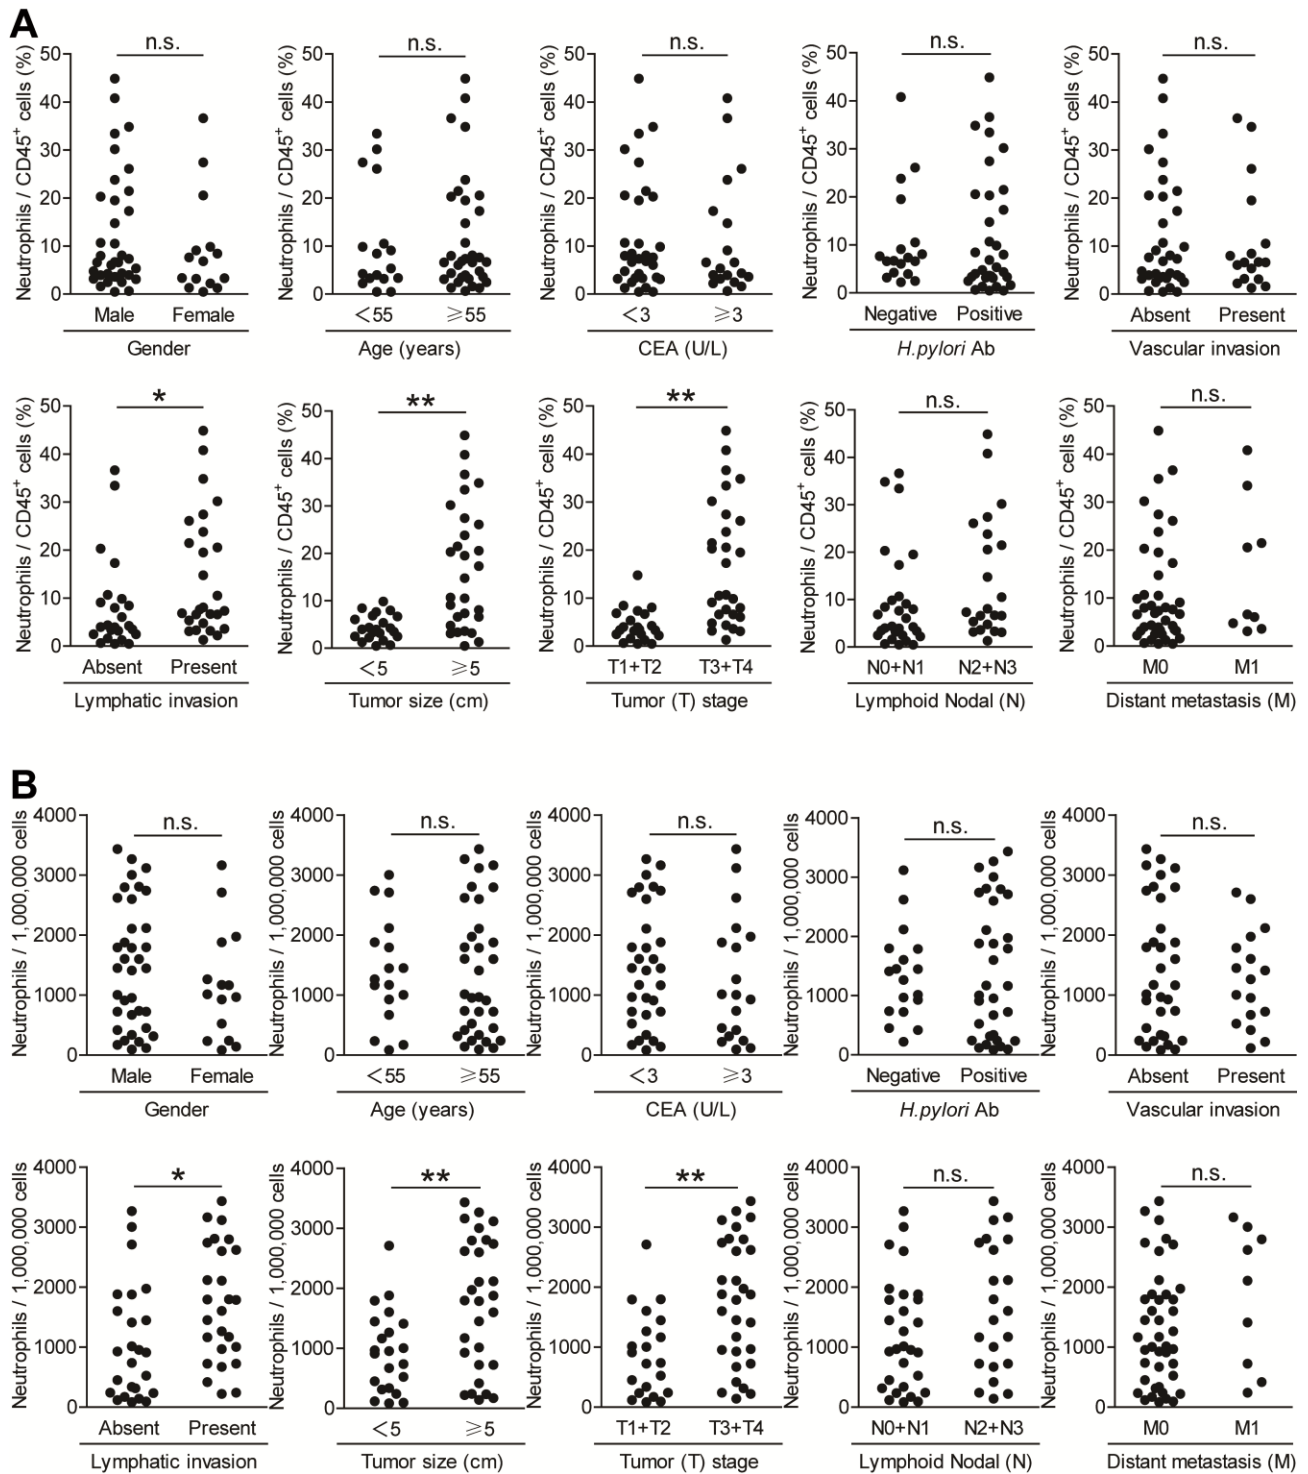

Figure S1. Neutrophil percentage or neutrophil number and its potential correlations with clinical parameters (cohort 1). (A and B) Neutrophil percentage in CD45<sup>+</sup> leukocytes (A) or neutrophil number per million total cells (B) was analyzed for correlations with clinical pathological parameters. Data are analyzed by Student *t* test and Mann-Whitney U test. \**P*<0.05, \*\**P*<0.01, n.s *P*>0.05 for groups connected by horizontal lines. CEA, carcinoembryonic antigen; *H. pylori* Ab, *Helicobacter pylori* antibody.

Figure S2.

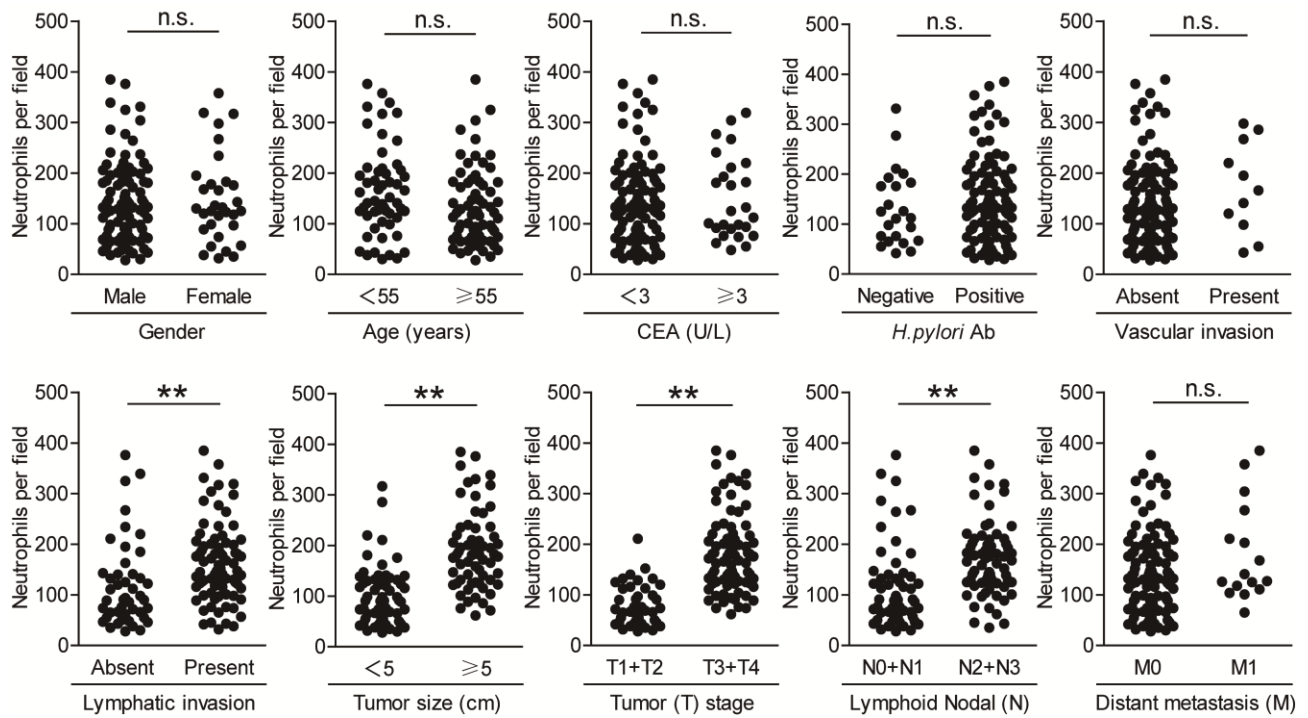

Figure S2. Neutrophil number and its potential correlations with clinical parameters (cohort 2). Neutrophil number per field was analyzed for correlations with clinical pathological parameters. Data are analyzed by Student *t* test and Mann-Whitney U test. \* $P < 0.05$ , \*\* $P < 0.01$ , n.s  $P > 0.05$  for groups connected by horizontal lines. CEA, carcinoembryonic antigen; *H.pylori* Ab, *Helicobacter pylori* antibody.

Figure S3.

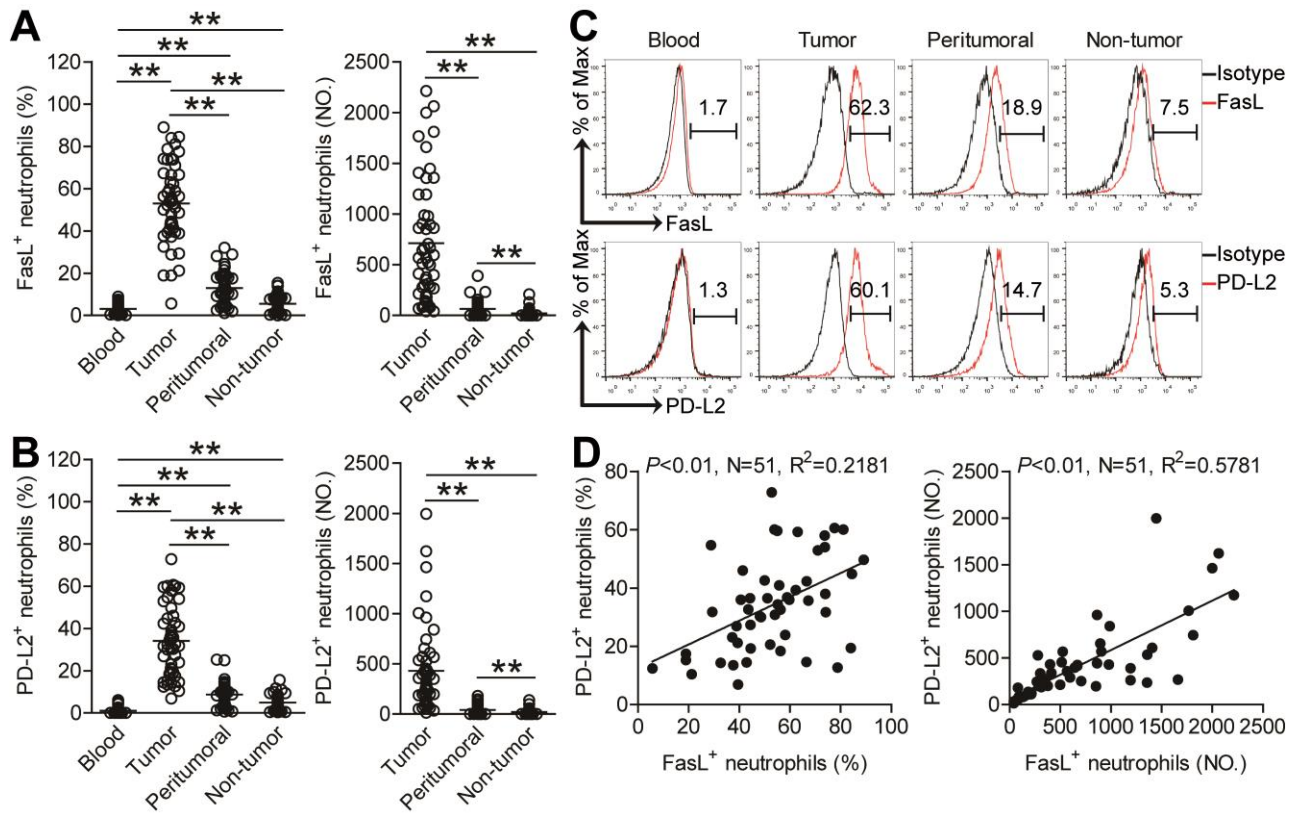

Figure S3. FasL<sup>+</sup>PD-L2<sup>+</sup> neutrophil subset with a unique phenotype is increased in GC as tumor progresses. (A) Statistics analysis of FasL<sup>+</sup> neutrophil percentage or PD-L2<sup>+</sup> neutrophil percentage in total neutrophils in samples of patients with GC (n=51). (B) Statistics analysis of FasL<sup>+</sup> neutrophil number or PD-L2<sup>+</sup> neutrophil number per million total cells in samples of patients with GC (n=51). (C) Expression of molecules FasL and PD-L2 on neutrophils. Color histograms represent staining of functional molecule FasL and PD-L2. (D) The correlations between FasL<sup>+</sup> neutrophils and PD-L2<sup>+</sup> neutrophils in GC tumors were analyzed. Data are mean  $\pm$  SEM and analyzed by Student *t* test, Mann-Whitney U test and 1-way ANOVA. \* $P < 0.05$ , \*\* $P < 0.01$ , n.s.  $P > 0.05$  for groups connected by horizontal lines.

Figure S4.

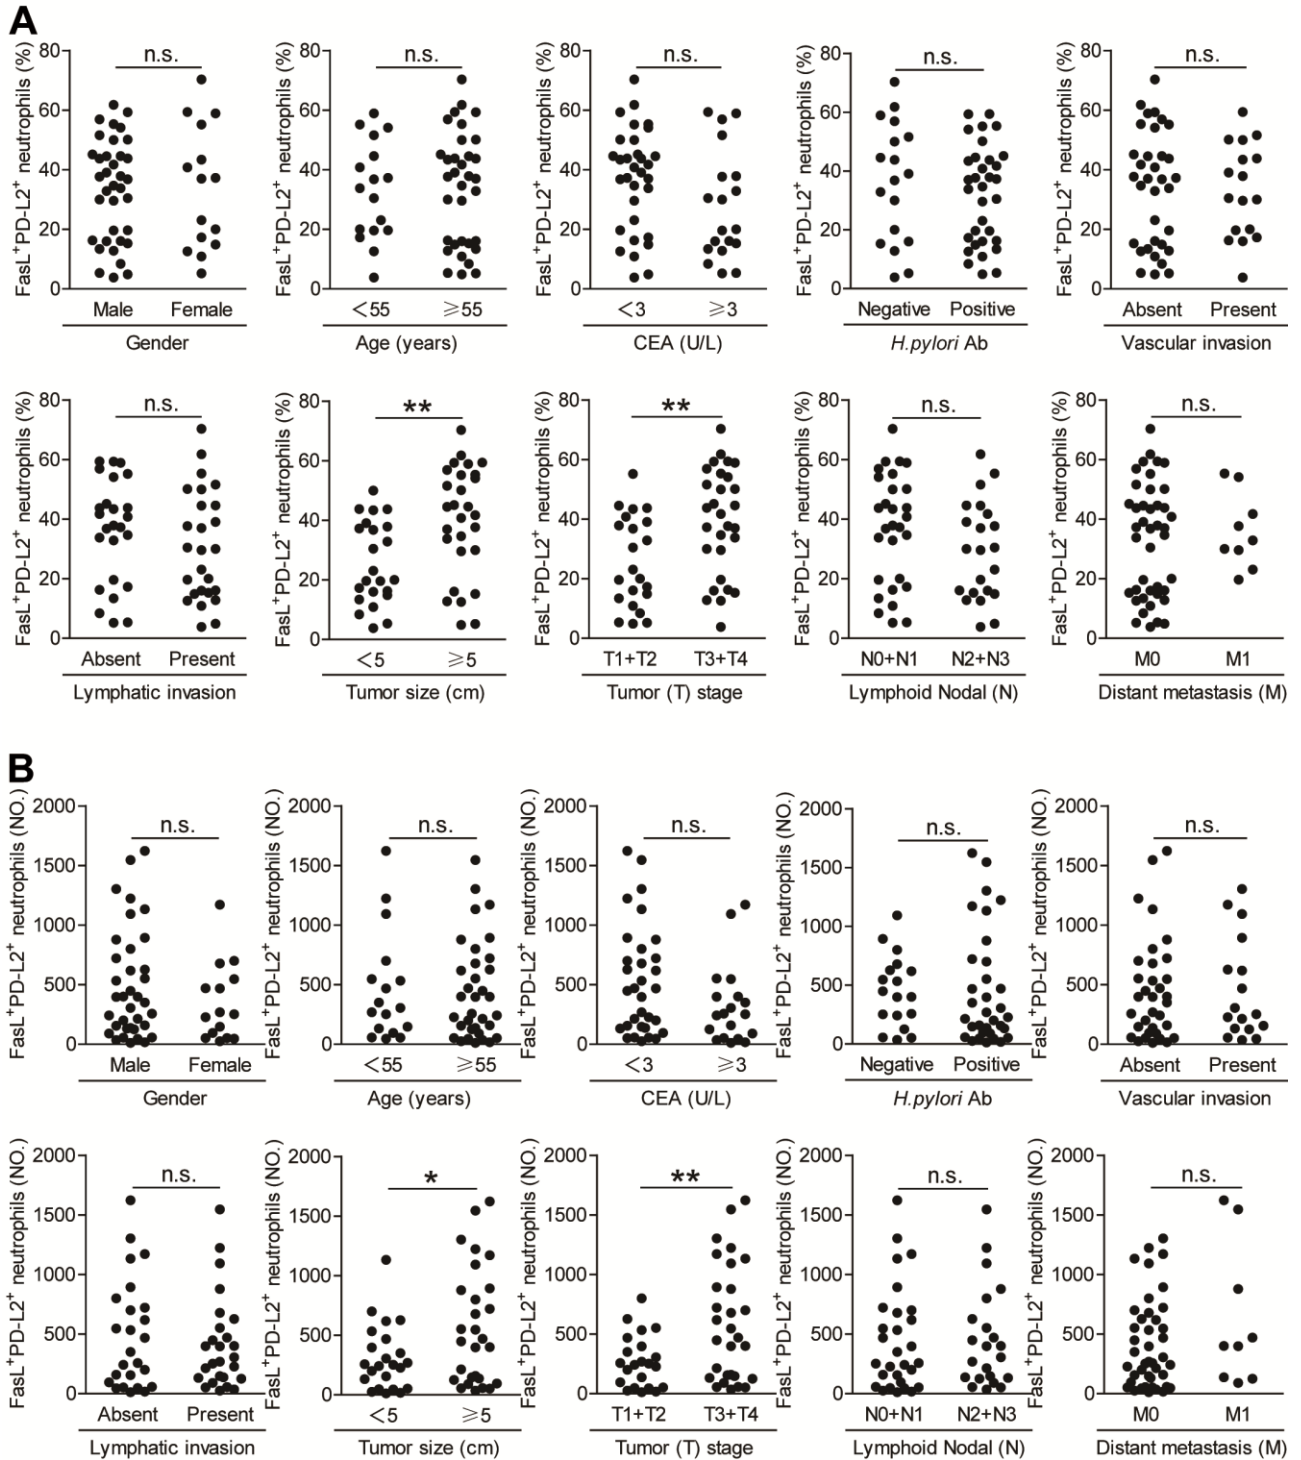

Figure S4. FasL<sup>+</sup>PD-L2<sup>+</sup> neutrophils and their potential correlations with clinical parameters (cohort 1). (A and B) FasL<sup>+</sup>PD-L2<sup>+</sup> neutrophil percentage in neutrophils (A) or FasL<sup>+</sup>PD-L2<sup>+</sup> neutrophil number per million total cells (B) was analyzed for correlations with clinical pathological parameters. Data are analyzed by Student *t* test and Mann-Whitney U test. \**P*<0.05, \*\**P*<0.01, n.s. *P*>0.05 for groups connected by horizontal lines. CEA, carcinoembryonic antigen; *H. pylori* Ab, *Helicobacter pylori* antibody.

Figure S5.

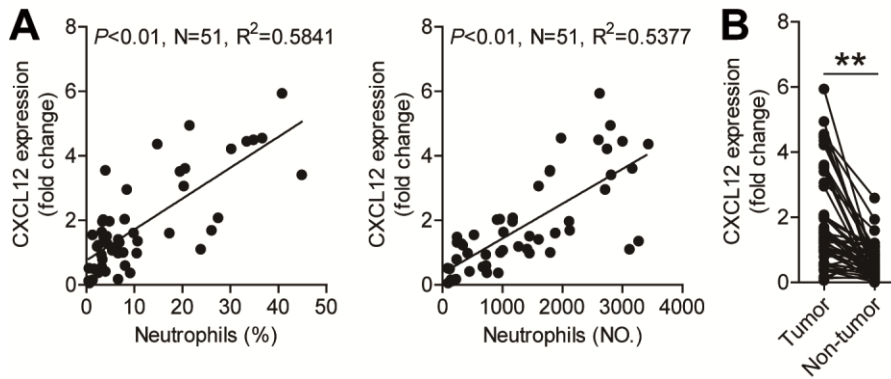

Figure S5. Increased neutrophil accumulation in GC tumors is promoted by CXCL12-CXCR4-mediated chemotaxis. (A) The correlations between neutrophils and CXCL12 in GC tumors were analyzed. Results were expressed as neutrophil percentage in  $CD45^+$  leukocytes or neutrophil number per million total cells and CXCL12 expression in tumor tissues. (B) CXCL12 expression between autologous tumor and non-tumor tissues ( $n=51$ ) was analyzed. Data are analyzed by Student  $t$  test and Mann-Whitney U test. \* $P < 0.05$ , \*\* $P < 0.01$ , n.s  $P > 0.05$  for groups connected by horizontal lines.



Figure S6.

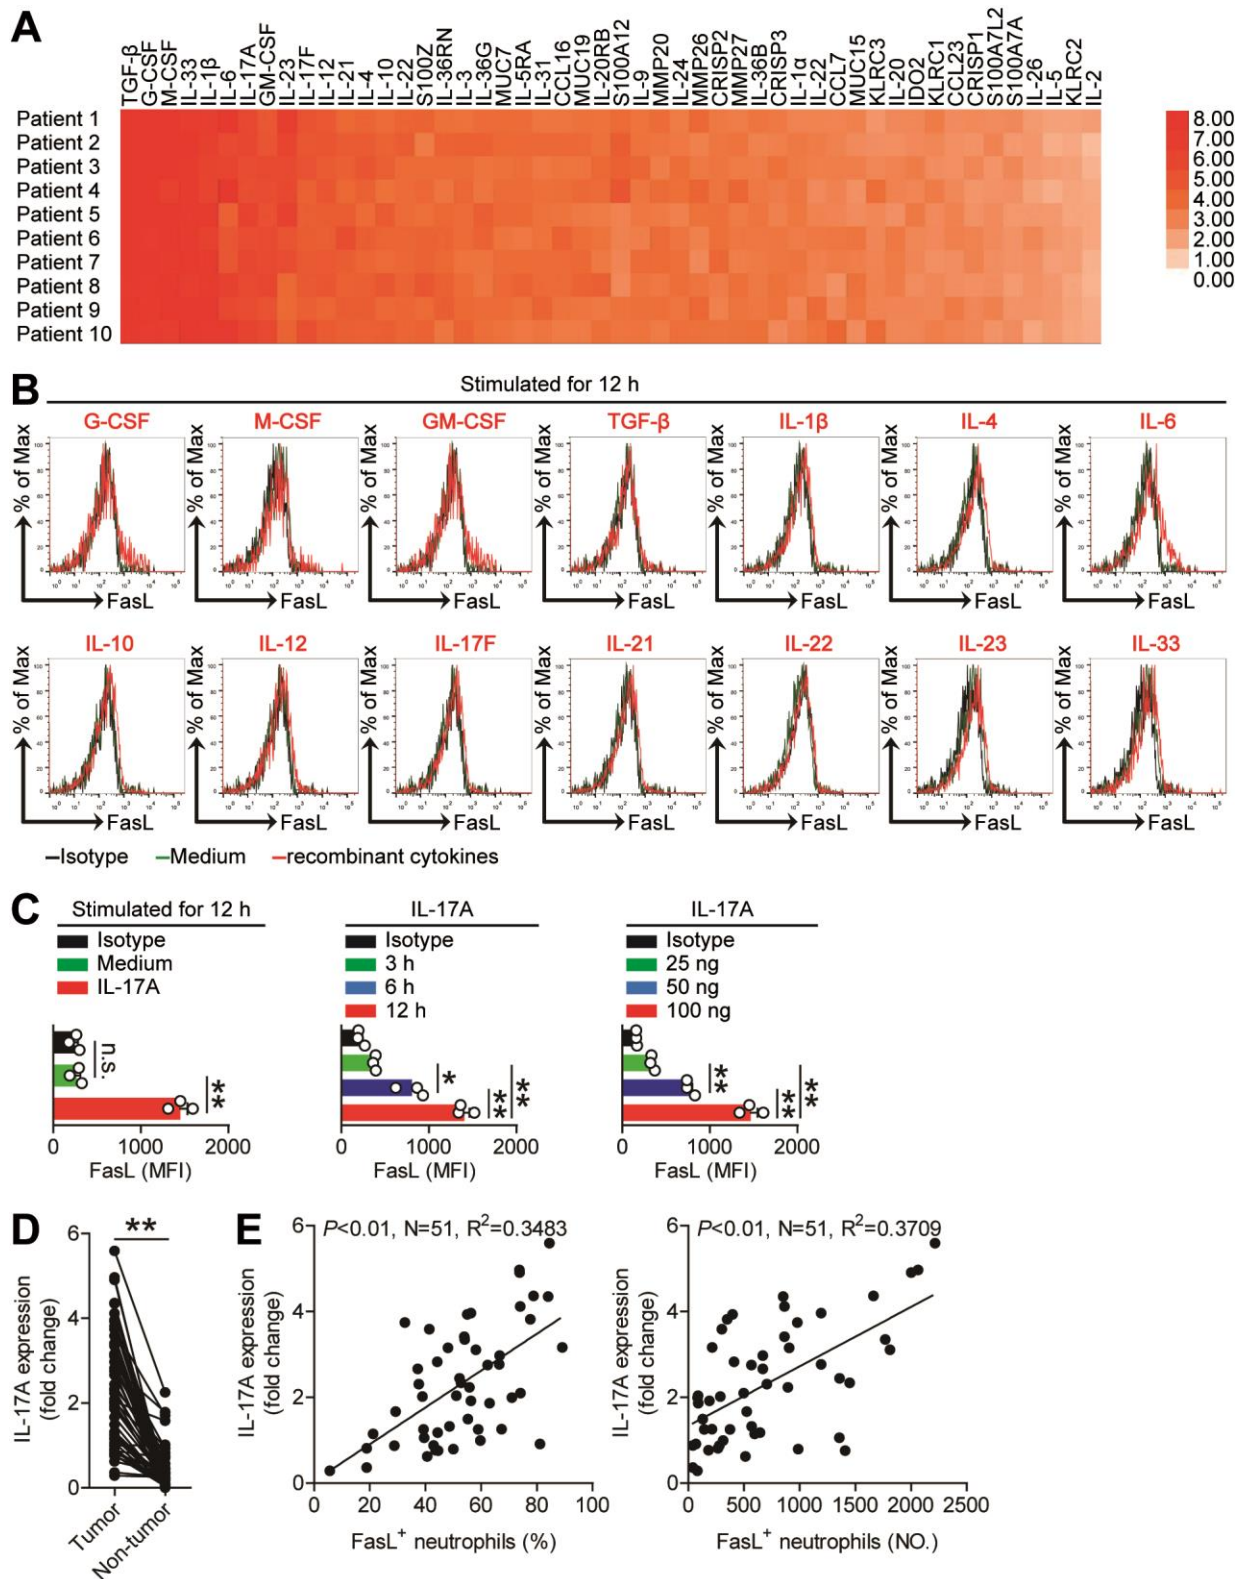

Figure S6. IL-17A induces neutrophil FasL expression. (A) Clustering of microarray data for the expression of 50 pro-inflammatory cytokine genes in human tumor tissues from 10 GC patients. (B) Expression of FasL on neutrophils exposed to G-CSF, M-CSF, GM-CSF, TGF- $\beta$ , IL-1 $\beta$ , IL-4, IL-6, IL-10, IL-12, IL-17F, IL-21, IL-22, IL-23, IL-33 (100 ng/ml) for 12 h. (C) Statistical analysis of the expression of FasL on neutrophils exposed to IL-17A (100 ng/ml) or medium control for 12 h, or

exposed to IL-17A (100 ng/ml) for 3, 6, 12 h, or exposed to IL-17A (25, 50, or 100 ng/ml) for 12 h (n=3). (D) IL-17A expression between autologous tumor and non-tumor tissues (n=51) was analyzed. (E) The correlations between FasL<sup>+</sup> neutrophils and IL-17A in GC tumors were analyzed. Results were expressed as FasL<sup>+</sup> neutrophil percentage in total neutrophils or FasL<sup>+</sup> neutrophil number per million total cells and IL-17A expression in tumor tissues. Data are mean ± SEM and analyzed by Student *t* test, Mann-Whitney U test and 1-way ANOVA. \**P*<0.05, \*\**P*<0.01, n.s *P*>0.05 for groups connected by horizontal lines.



Figure S7.

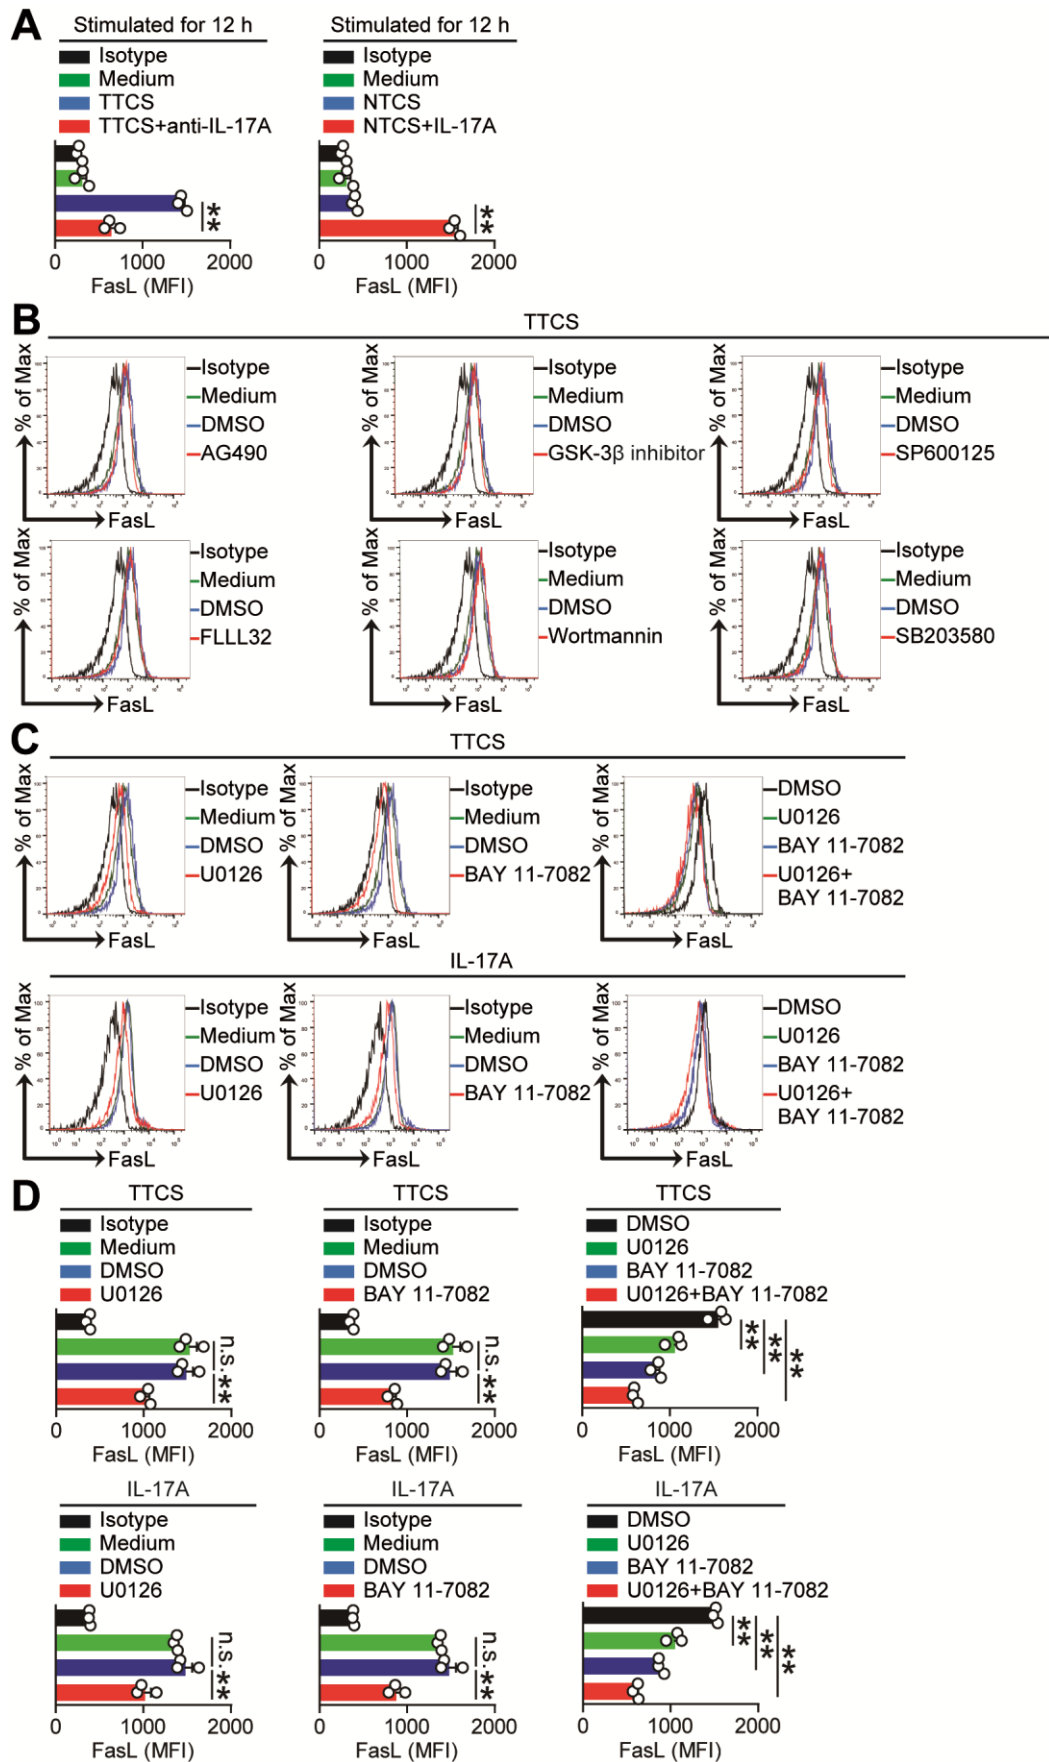

Figure S7. IL-17A induces neutrophil FasL expression via activating ERK-NF- $\kappa$ B signaling pathway. (A) Statistical analysis of the expression of FasL on neutrophils exposed to TTCS with

anti-IL-17A antibody or NTCS with IL-17A for 12 h (n=3). (B) Expression of FasL on neutrophils exposed to 50% TTCS with or without AG490 (a JAK inhibitor), SP600125 (a JNK inhibitor), FLLL32 (an STAT3 inhibitor), Wortmannin (a PI3K inhibitor), SB203580 (an MAPK inhibitor), or GSK-3 $\beta$  inhibitor for 12 h. (C) Expression of FasL on neutrophils exposed to TTCS or IL-17A with or without U0126 and/or BAY 11-7082 for 12 h. (D) Statistical analysis of the expression of FasL on neutrophils exposed to TTCS or IL-17A with or without U0126 and/or BAY 11-7082 for 12 h (n=3). Data are mean  $\pm$  SEM and analyzed by Student *t* test, Mann-Whitney U test and 1-way ANOVA. \**P*<0.05, \*\**P*<0.01, n.s. *P*>0.05 for groups connected by horizontal lines.

Figure S8.

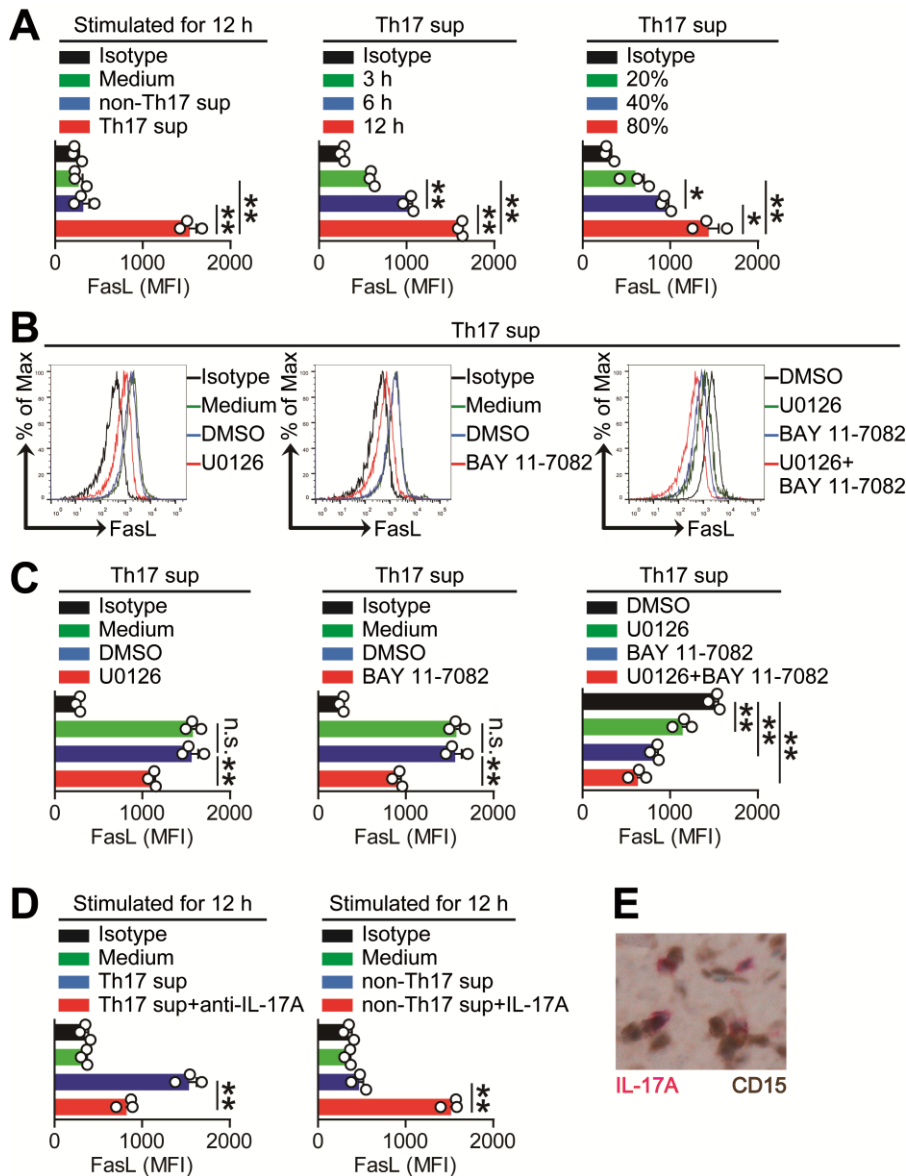

Figure S8. Th17 cell-derived IL-17A induces neutrophil FasL expression via activating ERK-NF- $\kappa$ B signaling pathway. (A) Statistical analysis of the expression of FasL on neutrophils exposed to Th17 sup, non-Th17 sup or medium control for 12 h, or exposed to Th17 sup for 3, 6, 12 h, or exposed to Th17 sup (20%, 40%, or 80%) for 12 h (n=3). (B) Expression of FasL on neutrophils exposed to Th17 sup with or without U0126 and/or BAY 11-7082 for 12 h. (C) Statistical analysis of the expression of FasL on neutrophils exposed to Th17 sup with or without U0126 and/or BAY 11-7082 for 12 h (n=3). (D) Statistical analysis of the expression of FasL on neutrophils exposed to Th17 sup with anti-IL-17A antibody or non-Th17 sup with IL-17A for 12 h (n=3). (E) Representative image of CD15<sup>+</sup> neutrophils and IL-17A<sup>+</sup> cells in tumor tissues of GC patients by immunohistochemical staining. Data are mean  $\pm$  SEM and analyzed by Student *t* test, Mann-

Whitney U test and 1-way ANOVA. \* $P < 0.05$ , \*\* $P < 0.01$ , n.s  $P > 0.05$  for groups connected by horizontal lines. Th17 sup: Th17 cell culture supernatants; non-Th17 sup: non-Th17 cell culture supernatants.

Figure S9.

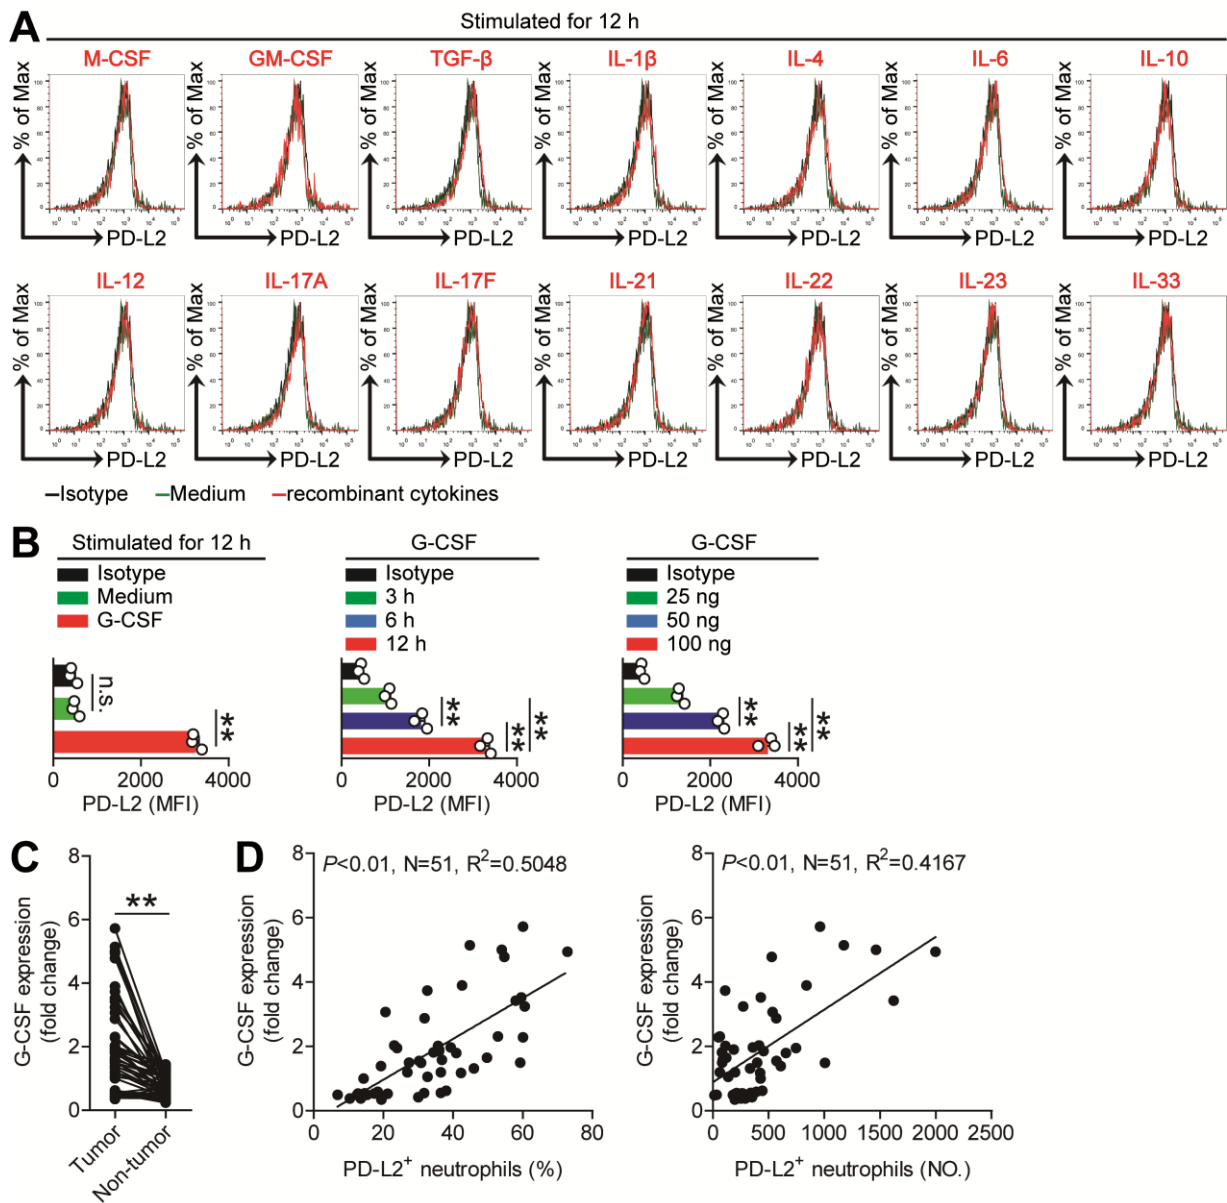

Figure S9. G-CSF induces neutrophil PD-L2 expression. (A) Expression of PD-L2 on neutrophils exposed to M-CSF, GM-CSF, TGF- $\beta$ , IL-1 $\beta$ , IL-4, IL-6, IL-10, IL-12, IL-17A, IL-17F, IL-21, IL-22, IL-23, IL-33 (100 ng/ml) for 12 h. (B) Statistical analysis of the expression of PD-L2 on neutrophils exposed to G-CSF (100 ng/ml) or medium control for 12 h, or exposed to G-CSF (100 ng/ml) for 3, 6, 12 h, or exposed to G-CSF (25, 50, or 100 ng/ml) for 12 h (n=3). (C) G-CSF expression between autologous tumor and non-tumor tissues (n=51) was analyzed. (D) The correlations between PD-L2<sup>+</sup> neutrophils and G-CSF in GC tumors were analyzed. Results were expressed as PD-L2<sup>+</sup> neutrophil percentage in total neutrophils or PD-L2<sup>+</sup> neutrophil number per million total cells and G-CSF expression in tumor tissues. Data are mean  $\pm$  SEM and analyzed by Student *t* test, Mann-Whitney U test and 1-way ANOVA. \* $P < 0.05$ , \*\* $P < 0.01$ , n.s  $P > 0.05$  for groups connected by horizontal lines.

Figure S10.

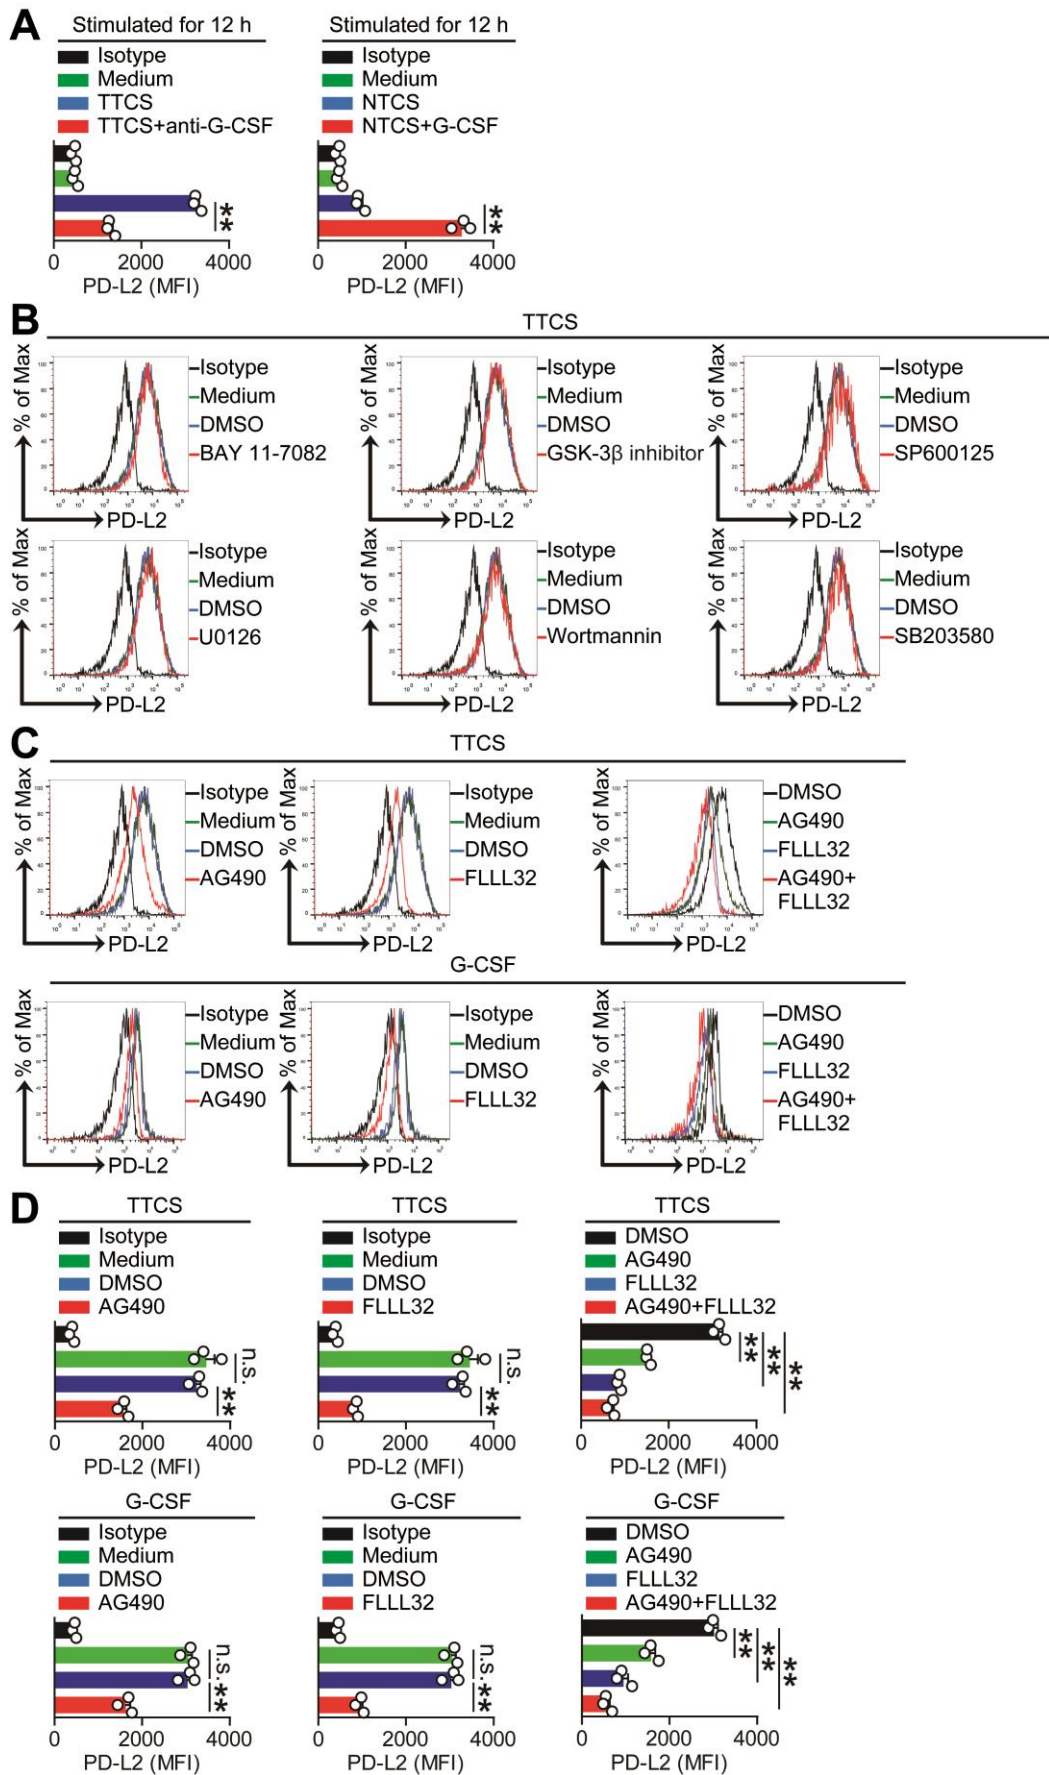

Figure S10. G-CSF induces neutrophil PD-L2 expression via activating JAK-STAT3 signaling pathway. (A) Statistical analysis of the expression of PD-L2 on neutrophils exposed to TTCS with



anti-G-CSF antibody or NTCS with G-CSF for 12 h (n=3). (B) Expression of PD-L2 on neutrophils exposed to 50% TTCS with or without BAY 11-7082 (an I $\kappa$ B $\alpha$  inhibitor), SP600125 (a JNK inhibitor), U0126 (an ERK inhibitor), Wortmannin (a PI3K inhibitor), SB203580 (an MAPK inhibitor), or GSK-3 $\beta$  inhibitor for 12 h. (C) Expression of PD-L2 on neutrophils exposed to TTCS or G-CSF with or without AG490 and/or FLLL32 for 12 h. (D) Statistical analysis of the expression of PD-L2 on neutrophils exposed to TTCS or G-CSF with or without AG490 and/or FLLL32 for 12 h (n=3). Data are mean  $\pm$  SEM and analyzed by Student *t* test, Mann-Whitney U test and 1-way ANOVA. \**P*<0.05, \*\**P*<0.01, n.s *P*>0.05 for groups connected by horizontal lines.

Figure S11.

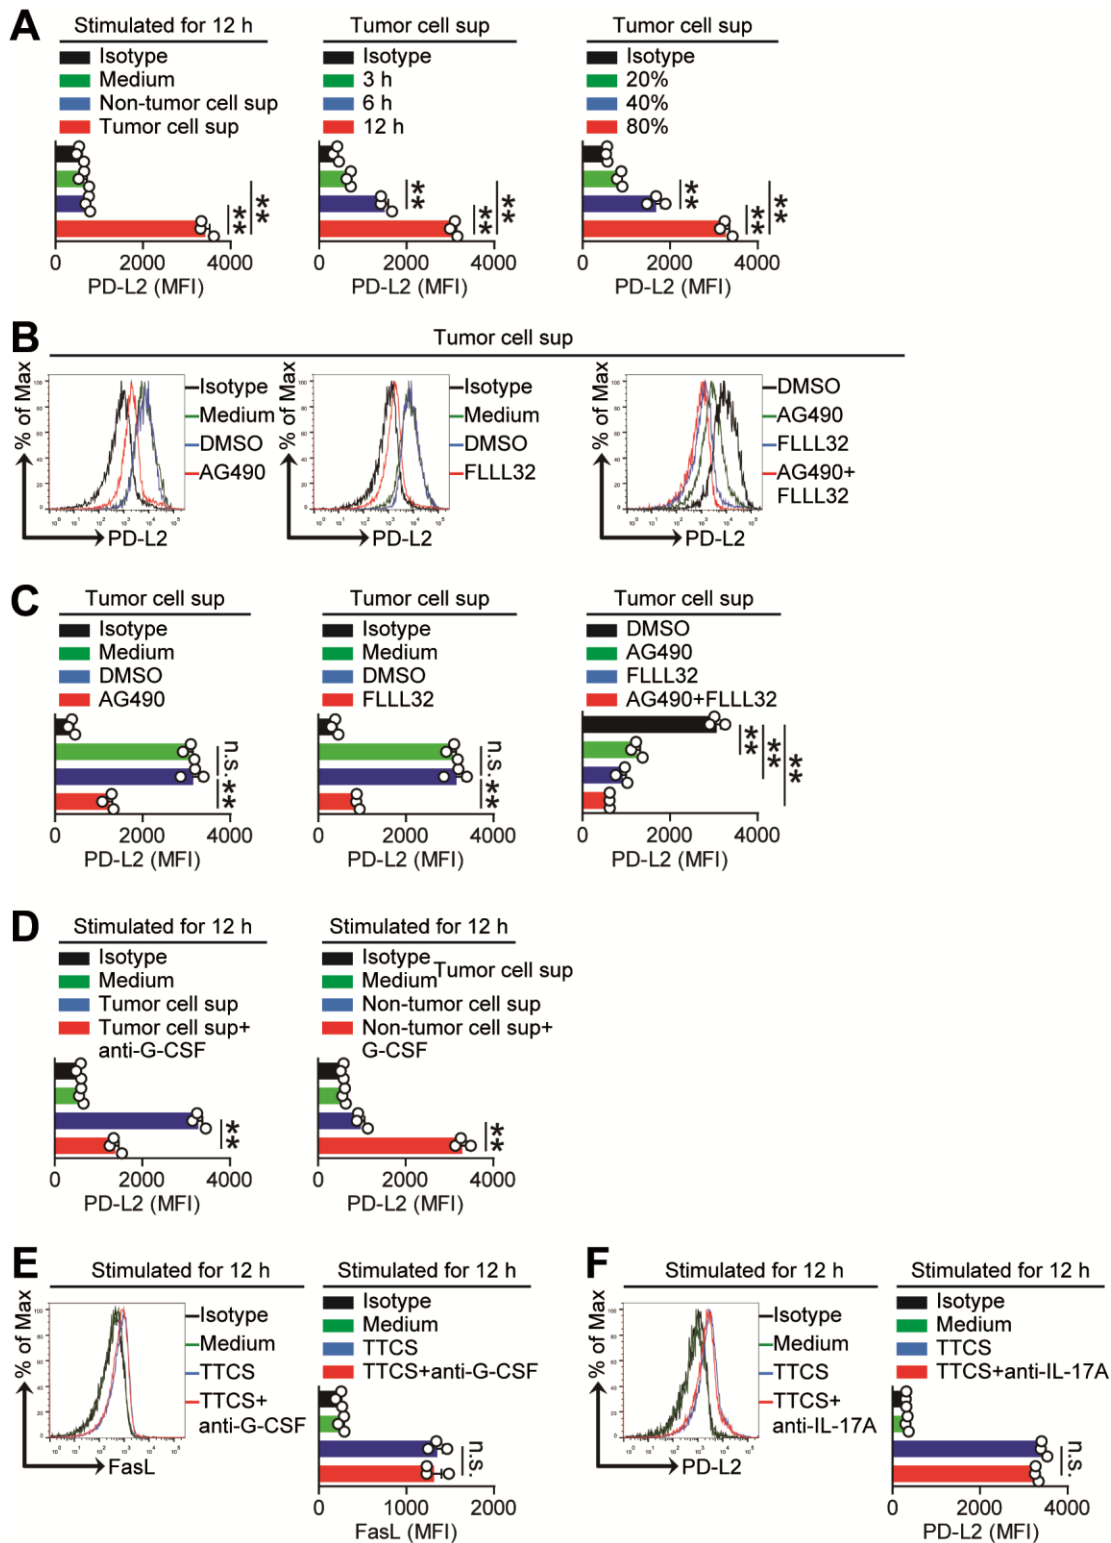

Figure S11. Tumor cell-derived G-CSF induces neutrophil PD-L2 expression via activating JAK-STAT3 signaling pathway. (A) Statistical analysis of the expression of PD-L2 on neutrophils exposed to tumor cell sup, non-tumor cell sup or medium control for 12 h, or exposed to tumor cell sup for 3, 6, 12 h, or exposed to tumor cell sup (20%, 40%, or 80%) for 12 h (n=3). (B) Expression of PD-L2 on neutrophils exposed to tumor cell sup with or without AG490 and/or FLLL32 for 12 h. (C) Statistical analysis of the expression of PD-L2 on neutrophils exposed to tumor cell sup with or

without AG490 and/or FLLL32 for 12 h (n=3). (D) Statistical analysis of the expression of PD-L2 on neutrophils exposed to tumor cell sup with anti-G-CSF antibody or non-tumor cell sup with G-CSF for 12 h (n=3). (E) Representative data and statistical analysis of the expression of FasL on neutrophils exposed to TTCS with anti-G-CSF antibody for 12 h (n=3). (F) Representative data and statistical analysis of the expression of PD-L2 on neutrophils exposed to TTCS with anti-IL-17A antibody for 12 h (n=3). Data are mean  $\pm$  SEM and analyzed by Student *t* test, Mann-Whitney U test and 1-way ANOVA. \**P*<0.05, \*\**P*<0.01, n.s *P*>0.05 for groups connected by horizontal lines. Tumor cell sup: tumor cell culture supernatants; Non-tumor cell sup: non-tumor cell culture supernatants.

Figure S12.

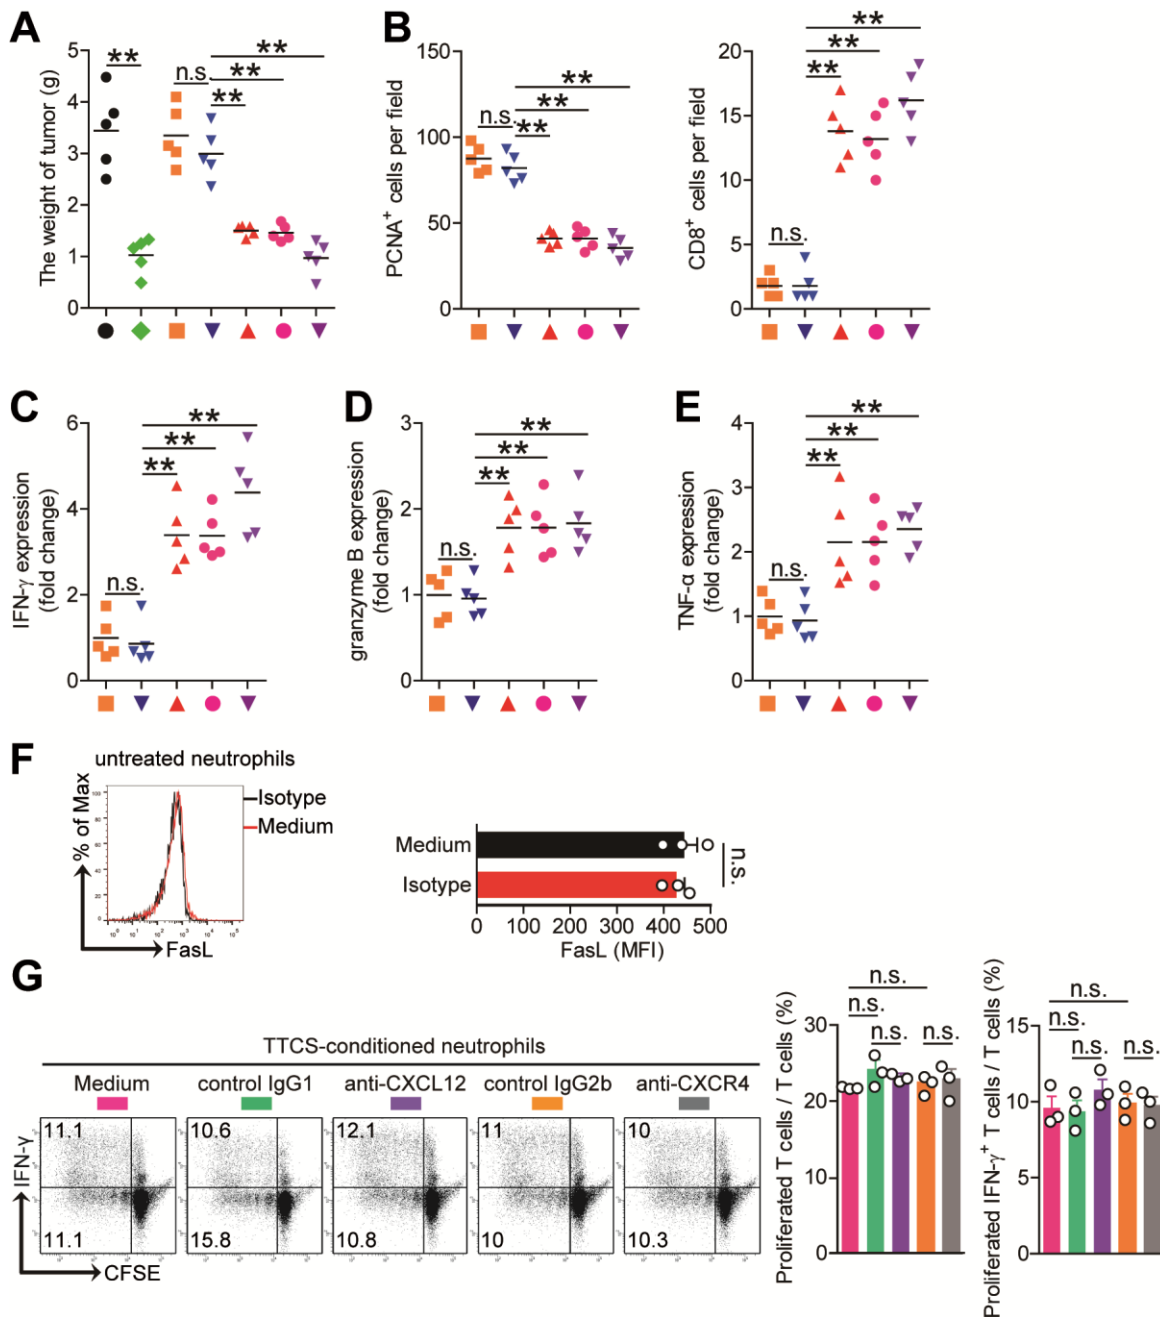

Figure S12. Blockade of neutrophil-associated FasL and PD-L2 on tumor-specific CD8<sup>+</sup> T-cell immunity inhibits tumor growth and GC progression. (A) Mice were injected with human SGC-7901 cells, as described in Methods. The control animals received no further injections. The experimental treatments entailed injections with tumor-specific CD8<sup>+</sup> T cells in combination with untreated neutrophils (N) or TTCS-conditioned neutrophils (TCN), or TCN pretreated with anti-FasL and/or anti-PD-L2 antibody or a control IgG. Statistical analysis of tumor weight on day 28 after tumor cell injection (n=5). (B) Statistical analysis of the expression of proliferating cell nuclear antigen (PCNA) or the infiltration of CD8<sup>+</sup> T cells in tumors of mice injected with tumor-specific CD8<sup>+</sup> T cells in combination with TTCS-conditioned neutrophils (TCN), or TCN pretreated with anti-FasL and/or anti-PD-L2 antibody or a control IgG on day 28 after tumor cell injection

(n=5). (C-E) IFN- $\gamma$  expression (C), granzyme B expression (D) and TNF- $\alpha$  expression (E) in tumors of mice injected with tumor-specific CD8<sup>+</sup> T cells in combination with TTCS-conditioned neutrophils (TCN), or TCN pretreated with anti-FasL and/or anti-PD-L2 antibody or a control IgG on day 28 after tumor cell injection were compared (n=5). (F) Representative data and statistical analysis of the expression of FasL on untreated neutrophils (n=3). (G) CFSE-labeled tumor-specific CD8<sup>+</sup> T cells of donors were co-cultured for 5 days with autologous TTCS-conditioned neutrophils with or without anti-CXCR4 and/or anti-CXCL12 antibodies. Representative data and statistical analysis of T cell proliferation and proliferated IFN- $\gamma$ -producing T cells were shown (n=3). Data are mean  $\pm$  SEM and analyzed by Student *t* test, Mann-Whitney U test and 1-way ANOVA. \**P*<0.05, \*\**P*<0.01, n.s *P*>0.05 for groups connected by horizontal lines.

Figure S13.

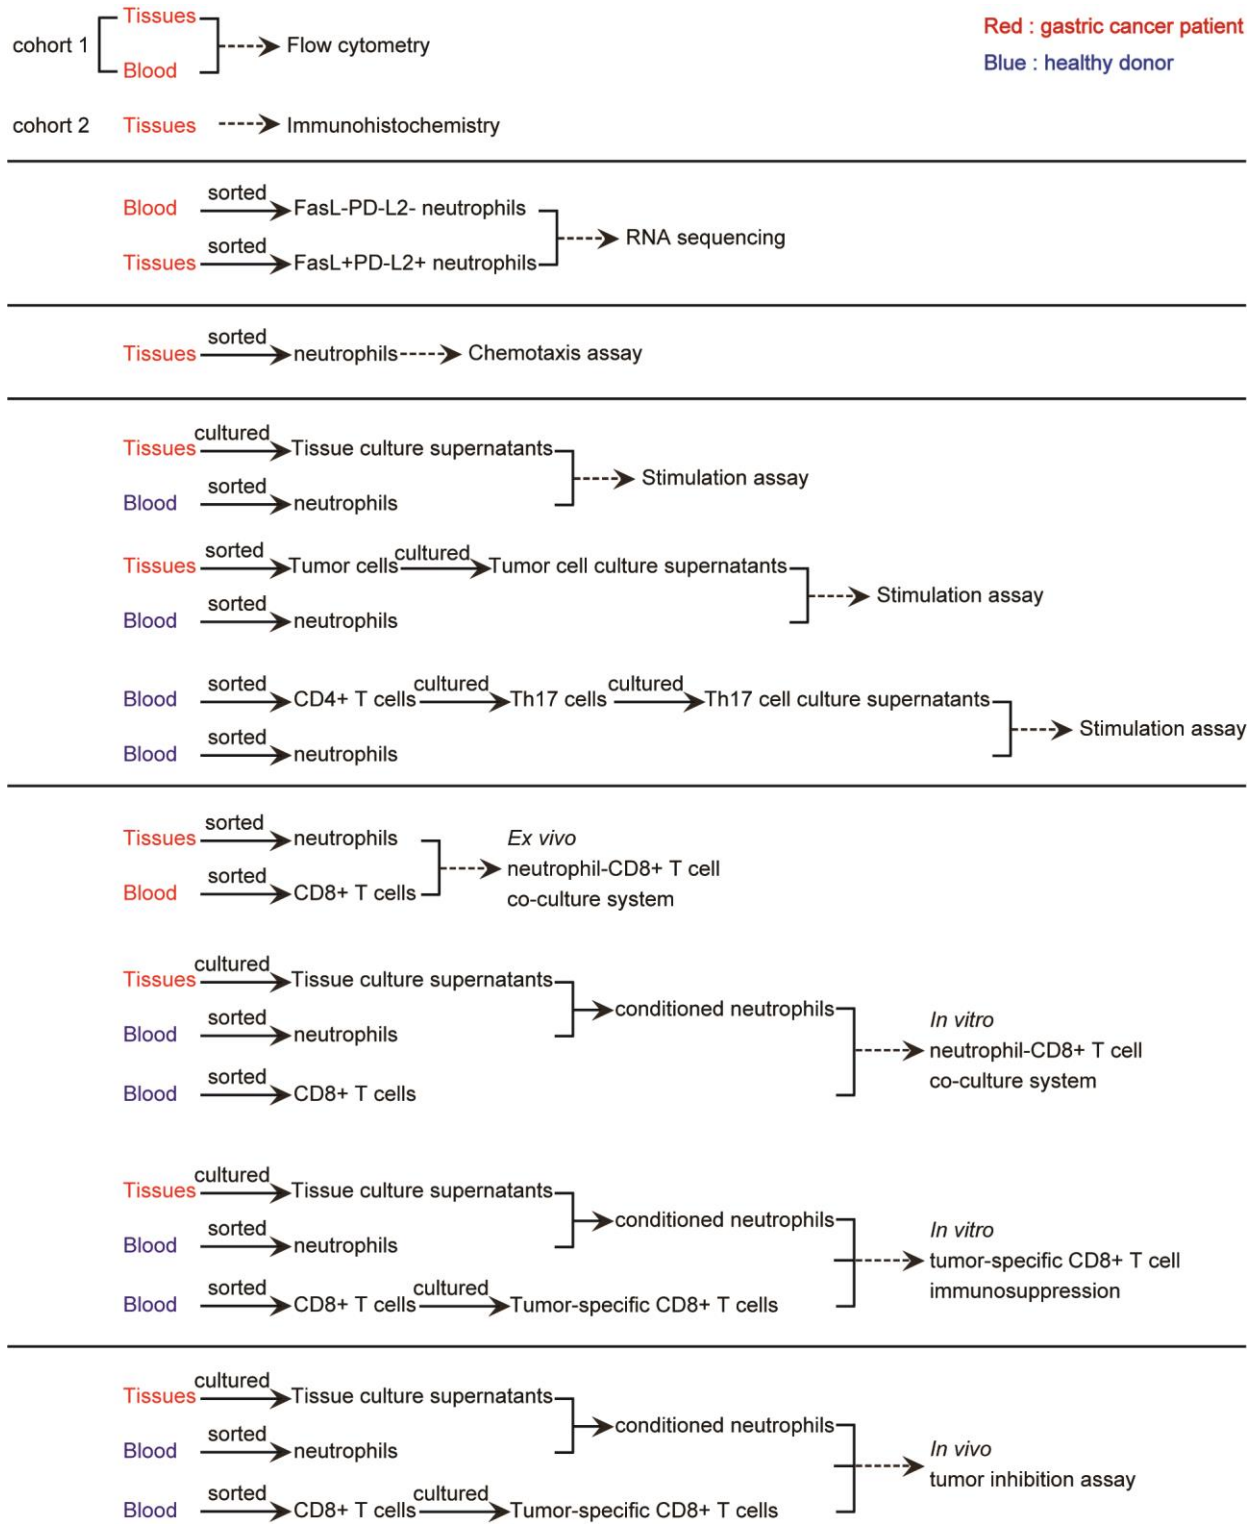

Figure S13. A schematic diagram outlining the experimental design is shown.



Table S1. Univariate and multivariate analyses of factors associated with overall survival

| Variables                                   | Univariate | Multivariate |             |         |
|---------------------------------------------|------------|--------------|-------------|---------|
|                                             | P-value    | HR           | 95% CI      | P-value |
| Gender (male vs. female)                    | 0.905      |              |             | NA      |
| Age, years ( $\geq 55$ vs. $< 55$ )         | 0.792      |              |             | NA      |
| H.pylori Ab (positive vs. negative)         | 0.512      |              |             | NA      |
| CEA,U/L ( $\geq 3$ vs. $< 3$ )              | 0.798      |              |             | NA      |
| Tumor size, cm ( $\geq 5$ vs. $< 5$ )       | 0.001      |              |             | 0.574   |
| Lymphatic invasion (positive vs. negative)  | 0.014      |              |             | 0.199   |
| Vascular invasion (positive vs. negative)   | 0.052      |              |             | NA      |
| Tumor (T) invasion (T1+T2 vs. T3+T4)        | $<0.001$   |              |             | 0.721   |
| Lymphoid Nodal (N) status (N0+N1 vs. N2+N3) | 0.004      |              |             | 0.392   |
| Distant metastasis (M) status (M0 vs. M1)   | 0.175      |              |             | NA      |
| TNM stage (I+II vs. III+IV)                 | $<0.001$   | 2.359        | 1.158-4.805 | 0.018   |
| Neutrophil number (high vs. low)            | $<0.001$   | 1.005        | 1.002-1.008 | 0.003   |

Cox proportional hazards regression model. Variables used in multivariate analysis were adopted by univariate analysis.

<sup>a</sup>Neutrophil number was acquired by immunohistochemical staining and counting and was expressed as number per field. CEA, carcinoembryonic antigen; H.pylori Ab, Helicobacter pylori antibody; HR, hazard ratio; CI, confidence interval; NA, not adopted.

Table S2. Univariate and multivariate analyses of factors associated with disease-free survival

| Variables                                   | Univariate |       | Multivariate |         |
|---------------------------------------------|------------|-------|--------------|---------|
|                                             | P-value    | HR    | 95% CI       | P-value |
| Gender (male vs. female)                    | 0.956      |       |              | NA      |
| Age, years ( $\geq 55$ vs. $< 55$ )         | 0.937      |       |              | NA      |
| H.pylori Ab (positive vs. negative)         | 0.608      |       |              | NA      |
| CEA,U/L ( $\geq 3$ vs. $< 3$ )              | 0.496      |       |              | NA      |
| Tumor size, cm ( $\geq 5$ vs. $< 5$ )       | 0.001      |       |              | NA      |
| Lymphatic invasion (positive vs. negative)  | 0.007      |       |              | NA      |
| Vascular invasion (positive vs. negative)   | 0.019      |       |              | NA      |
| Tumor (T) invasion (T1+T2 vs. T3+T4)        | $<0.001$   |       |              | NA      |
| Lymphoid Nodal (N) status (N0+N1 vs. N2+N3) | 0.003      |       |              | NA      |
| Distant metastasis (M) status (M0 vs. M1)   | 0.236      |       |              | NA      |
| TNM stage (I+II vs. III+IV)                 | $<0.001$   | 2.661 | 1.343-5.273  | 0.005   |
| Neutrophil number (high vs. low)            | $<0.001$   | 1.005 | 1.002-1.008  | 0.001   |

Cox proportional hazards regression model. Variables used in multivariate analysis were adopted by univariate analysis.

aNeutrophil number was acquired by immunohistochemical staining and counting and was expressed as number per field. CEA, carcinoembryonic antigen; H.pylori Ab, Helicobacter pylori antibody; HR, hazard ratio; CI, confidence interval; NA, not adopted.

Table S3. Univariate and multivariate analyses of factors associated with survival

| Variables                                                     | Univariate |       | Multivariate |         |
|---------------------------------------------------------------|------------|-------|--------------|---------|
|                                                               | P-value    | HR    | 95% CI       | P-value |
| Gender (male vs. female)                                      | 0.875      |       |              | NA      |
| Age, years ( $\geq 55$ vs. $< 55$ )                           | 0.191      |       |              | NA      |
| H.pylori Ab (positive vs. negative)                           | 0.784      |       |              | NA      |
| CEA,U/L ( $\geq 3$ vs. $< 3$ )                                | 0.224      |       |              | NA      |
| Tumor size, cm ( $\geq 5$ vs. $< 5$ )                         | 0.055      |       |              | NA      |
| Lymphatic invasion (positive vs. negative)                    | 0.447      |       |              | NA      |
| Vascular invasion (positive vs. negative)                     | 0.857      |       |              | NA      |
| Tumor (T) invasion (T1+T2 vs. T3+T4)                          | 0.075      |       |              | NA      |
| Lymphoid Nodal (N) status (N0+N1 vs. N2+N3)                   | 0.110      |       |              | NA      |
| Distant metastasis (M) status (M0 vs. M1)                     | 0.779      |       |              | NA      |
| TNM stage (I+II vs. III+IV)                                   | 0.011      | 4.393 | 0.938-20.572 | 0.060   |
| FasL+PD-L2+ neutrophil percentage <sup>a</sup> (high vs. low) | 0.016      | 1.150 | 0.375-3.520  | 0.807   |
| FasL+PD-L2+ neutrophil number <sup>b</sup> (high vs. low)     | $<0.001$   | 5.461 | 1.486-20.066 | 0.011   |

Cox proportional hazards regression model. Variables used in multivariate analysis were adopted by univariate analysis. <sup>a</sup>FasL+PD-L2+ neutrophil percentage was acquired on CD45+CD11b+CD66b+CD15+FasL+PD-L2+ cells that gated on CD45+CD11b+CD66b+CD15+ cells of tumor tissues. <sup>b</sup>FasL+PD-L2+ neutrophil number was acquired by counting CD45+CD11b+CD66b+CD15+FasL+PD-L2+ cells per million cells of tumor tissues. CEA, carcinoembryonic antigen; H.pylori Ab, Helicobacter pylori antibody; HR, hazard ratio; CI, confidence interval; NA, not adopted.

Table S4. Clinical characteristics of 51 patients with gastric cancer (cohort 1)

| Variables                                                      | No. of patients  |
|----------------------------------------------------------------|------------------|
| Gender (male/female)                                           | 36/15            |
| Age (years; median, range)                                     | 61, 24-78        |
| H.pylori Ab (negative/positive)                                | 18/33            |
| CEA (U/L; <3/≥3)                                               | 32/19            |
| Tumor size (cm; <5/≥5)                                         | 23/28            |
| Lymphatic invasion (absent/present)                            | 25/26            |
| Vascular invasion (absent/present)                             | 34/17            |
| Tumor (T) invasion (T1+T2/T3+T4)                               | 22/29            |
| Lymphoid Nodal (N) status (N0+N1/N2+N3)                        | 29/22            |
| Distant metastasis (M) status (M0/M1)                          | 42/9             |
| TNM stage (I+II/III+IV)                                        | 19/32            |
| Neutrophil percentage <sup>a</sup> (median, range)             | 6.66, 0.46-44.87 |
| Neutrophil number <sup>b</sup> (median, range)                 | 1171, 85-3431    |
| FasL+PD-L2+ neutrophil percentage <sup>c</sup> (median, range) | 36.8, 3.85-70.3  |
| FasL+PD-L2+ neutrophil number <sup>d</sup> (median, range)     | 306, 13-1623     |

<sup>a</sup>Neutrophil percentage was acquired on CD45+CD11b+CD66b+CD15+ cells that gated on CD45+ cells of tumor tissues.

<sup>b</sup>Neutrophil number was acquired by counting CD45+CD11b+CD66b+CD15+ cells per million cells of tumor tissues. <sup>c</sup>FasL+PD-L2+

neutrophil percentage was acquired on CD45+CD11b+CD66b+CD15+FasL+PD-L2+ cells that gated on CD45+CD11b+CD66b+CD15+

cells of tumor tissues. <sup>d</sup>FasL+PD-L2+ neutrophil number was acquired by counting CD45+CD11b+CD66b+CD15+FasL+PD-L2+ cells

per million cells of tumor tissues. CEA, carcinoembryonic antigen; H.pylori Ab, Helicobacter pylori antibody.

Table S5. Clinical characteristics of 125 patients with gastric cancer (cohort 2)

| Variables                                      | No. of patients |
|------------------------------------------------|-----------------|
| Gender (male/female)                           | 93/32           |
| Age (years; median, range)                     | 56, 25-82       |
| H.pylori Ab (negative/positive)                | 23/102          |
| CEA (U/L; <3/≥3)                               | 99/26           |
| Tumor size (cm; <5/≥5)                         | 61/64           |
| Lymphatic invasion (absent/present)            | 45/80           |
| Vascular invasion (absent/present)             | 114/11          |
| Tumor (T) invasion (T1+T2/T3+T4)               | 42/83           |
| Lymphoid Nodal (N) status (N0+N1/N2+N3)        | 56/69           |
| Distant metastasis (M) status (M0/M1)          | 109/16          |
| TNM stage (I+II/III+IV)                        | 40/85           |
| Neutrophil number <sup>a</sup> (median, range) | 132, 28-385     |

<sup>a</sup>Neutrophil number was acquired by immunohistochemical staining and counting and was expressed as number per field. CEA, carcinoembryonic antigen; H.pylori Ab, Helicobacter pylori antibody.

Table S6. Antibodies and other reagents

| Antibodies and reagents                              | Manufacturers           |
|------------------------------------------------------|-------------------------|
| <b>Antibodies for flow cytometry</b>                 |                         |
| anti-CD45-PE-Cy7                                     | Biolegend               |
| anti-CD11b-PerCP-Cy5.5                               | Biolegend               |
| anti-CD66b-FITC                                      | Biolegend               |
| anti-CD15-APC-Cy7                                    | Biolegend               |
| anti-FasL-PE                                         | Biolegend               |
| anti-PD-L2-Alexa Fluor® 647                          | Biolegend               |
| anti-CXCR4-APC                                       | Biolegend               |
| anti-CD3-APC-Cy7                                     | BD Pharmingen           |
| anti-CD8-PerCP-Cy5.5                                 | Biolegend               |
| anti-IFN- $\gamma$ -PE-Cy7                           | BD Pharmingen           |
| anti-granzyme B-Alexa Fluor® 647                     | Biolegend               |
| anti-TNF- $\alpha$ -FITC                             | Biolegend               |
| <b>Antibodies for immunohistochemical staining</b>   |                         |
| anti-human CD15                                      | Abcam                   |
| anti-human MPO                                       | Abcam                   |
| anti-human FasL                                      | Abcam                   |
| anti-human PD-L2                                     | Abcam                   |
| anti-human IL-17A                                    | Abcam                   |
| anti-human CD8                                       | Abcam                   |
| anti-human proliferating cell nuclear antigen (PCNA) | Abcam                   |
| horseradish peroxidase anti-rabbit IgG               | Zhongshan Biotechnology |
| horseradish peroxidase anti-mouse IgG                | Zhongshan Biotechnology |
| DAB kit                                              | Zhongshan Biotechnology |
| EnVision™ G2 System/AP Rabbit/Mouse (Permanent Red)  | Dako                    |
| <b>Antibodies for immunofluorescence</b>             |                         |
| rabbit anti-human CD15                               | Abcam                   |
| mouse anti-human CD8                                 | Abcam                   |
| rabbit anti-human G-CSF                              | Abcam                   |
| mouse anti-human EpCam                               | Abcam                   |
| goat anti-rabbit-FITC                                | Zhongshan Biotechnology |
| goat anti-mouse-TRITC                                | Zhongshan Biotechnology |
| <b>Antibodies for neutralizing and blocking</b>      |                         |
| anti-human CXCL12 (Mouse IgG1)                       | R&D Systems             |
| Mouse IgG1 Isotype Control                           | R&D Systems             |
| anti-human CXCR4 (Mouse IgG2b)                       | R&D Systems             |



|                                             |                       |
|---------------------------------------------|-----------------------|
| Mouse IgG2b Isotype Control                 | R&D Systems           |
| anti-human G-CSF (Mouse IgG1)               | R&D Systems           |
| Mouse IgG1 Isotype Control                  | R&D Systems           |
| anti-human IL-17A (Rabbit IgG)              | Abcam                 |
| Rabbit IgG Control                          | Abcam                 |
| anti-human FasL (Mouse IgG2b)               | R&D Systems           |
| Mouse IgG2b Isotype Control                 | R&D Systems           |
| anti-human PD-L2 (Goat IgG)                 | R&D Systems           |
| Goat IgG Control                            | R&D Systems           |
| Antibodies for western blot                 |                       |
| anti-human p-p65                            | Abcam                 |
| anti-human p65                              | Abcam                 |
| anti-STAT3                                  | Abcam                 |
| anti-p-STAT3                                | Abcam                 |
| anti-human GAPDH                            | Abcam                 |
| Purified anti-CD3 and anti-CD28 antibodies  | Biologend             |
| ELISA kits                                  |                       |
| G-CSF                                       | R&D Systems           |
| TNF- $\alpha$                               | R&D Systems           |
| granzyme B                                  | eBioscience           |
| IFN- $\gamma$                               | Abcam                 |
| CXCL12                                      | Abcam                 |
| IL-17A                                      | Abcam                 |
| Reagents for signaling pathways inhibition  |                       |
| MEK-1 and MEK-2 inhibitor U0126             | Merk Millipore        |
| I $\kappa$ B $\alpha$ inhibitor BAY 11-7082 | Calbiochem            |
| JNK inhibitor SP600125                      | Calbiochem            |
| MAPK inhibitor SB203580                     | Calbiochem            |
| PI3K inhibitor Wortmannin                   | Calbiochem            |
| STAT3 phosphorylation inhibitor FLLL32      | MedKoo Biosciences    |
| JAK signaling inhibitor AG490               | Merk Millipore        |
| GSK-3 $\beta$ inhibitor VI                  | Calbiochem            |
| CD3 microbeads                              | Milteniy Biotec       |
| EpCam microbeads                            | Milteniy Biotec       |
| CD4 microbeads                              | StemCell Technologies |
| CD8 microbeads                              | StemCell Technologies |
| 3- $\mu$ m pore size Transwells             | Corning               |
| 0.4- $\mu$ m pore size Transwells           | Corning               |

|                                                        |                 |
|--------------------------------------------------------|-----------------|
| Collagenase IV                                         | Gibco           |
| DNase I                                                | Sigma-Aldrich   |
| Phorbol myristate acetate                              | Sigma-Aldrich   |
| Ionomycin                                              | Sigma-Aldrich   |
| DMSO                                                   | Sigma-Aldrich   |
| Golgistop and Perm/Wash solution                       | BD Pharmingen   |
| Carboxylfluorescein succinimidyl ester (CFSE)          | eBioscience     |
| Protein Extraction Reagent                             | Pierce          |
| SuperSignal® West Dura Extended Duration Substrate kit | Thermo          |
| Fetal calf serum (FCS)                                 | Gibco           |
| Penicillin/Streptomycin                                | Gibco           |
| RPMI-1640                                              | Hyclone         |
| Ficoll-Paque Plus                                      | GE Healthcare   |
| lyses solution                                         | TIANGEN         |
| TRIzol reagent                                         | Invitrogen      |
| PrimeScript™ RT reagent Kit                            | TaKaRa          |
| Real-time PCR Master Mix                               | Toyobo          |
| human IL-17 Secretion Assay-Detection Kits             | Miltenyi Biotec |
| All recombinant cytokines and chemokines               | PeproTech       |

---

APC-Cy7, allophycocyanin-cyanin 7; PE-Cy7, phycoerythrin-cyanin 7; FITC, Fluorescein isothiocyanate; PE, phycoerythrin; PerCP-Cy5.5, peridin chlorophyl protein-cyanin 5.5; APC, allophycocyanin; IL, interleukin; PCNA, proliferating cell nuclear antigen; MPO, myeloperoxidase.

Table S7. Primer and probe sequences for real-time PCR analysis

| Gene                | Primer  | Sequence 5'→3'          |
|---------------------|---------|-------------------------|
| Human CXCL12        | forward | TGGCGTGGAGCTGAGAGATAACC |
|                     | reverse | CGATGCCGGCTGATGGTGTGG   |
| Human IL-17A        | forward | TCCAAGGTGGAAGTGGTAGC    |
|                     | reverse | AGAAAAGTCTCCGCTGAAG     |
| Human G-CSF         | forward | CTGAGAGTGATTGAGAGTGG    |
|                     | reverse | ACAACCCTCTGCACCCAGTT    |
| Human IFN- $\gamma$ | forward | GAGATATCCCTCTGTGATCTGG  |
|                     | reverse | GACAGAGTTCATGTGGTAGTCC  |
| Human granzyme B    | forward | GAAAGTGCGAATCTGACTTACG  |
|                     | reverse | TTGTTTCGTCCATAGGAGACAA  |
| Human TNF- $\alpha$ | forward | TGGCGTGGAGCTGAGAGATAACC |
|                     | reverse | CGATGCCGGCTGATGGTGTGG   |
| Human GAPDH         | forward | ACCCAGAAGACTGTGGATGG    |
|                     | reverse | CAGTGAGCTTCCCGTTCAG     |
